# Supplementary material for: The effect of A-site doping in a strontium palladium perovskite and its applications for non-enzymatic glucose sensing
Source: Royal Society of Chemistry journal article supplement (doi:10.1039/c5ra24107c), 2016-01-01

### List of Supplementary Figures

**Supp. Figure 1:** XRD patterns of  $\text{Sr}_2\text{PdO}_3$  and  $\text{Sr}_{1.7}\text{M}_{0.3}\text{PdO}_3$  (with M= Ca, Mg and Ba) prepared by glycine-nitrate combustion method. Miller indices (h, l, k) are written in black line for  $\text{Sr}_2\text{PdO}_3$ , red line for  $\text{SrPd}_3\text{O}_4$ , the black symbol (0) for  $\text{SrCl}_2 \cdot 6 \text{H}_2\text{O}$ , red symbol (0) for KCl, blue symbol (0) for  $\text{SrCO}_3$  and pink symbol (0) for PdO.

**Supp. Figure 2:** SEM micrographs of (A) graphite/ $\text{Sr}_2\text{PdO}_3$  and (B) graphite/ $\text{Sr}_{1.7}\text{Ca}_{0.3}\text{PdO}_3$  with magnification 20,000 $\times$ .

**Supp. Figure 3:** The TEM diffraction patterns of (A)  $\text{Sr}_2\text{PdO}_3$  and (B)  $\text{Sr}_{1.7}\text{Ca}_{0.3}\text{PdO}_3$ .

**Supp. Figure 4:** The particle size distribution of  $\text{Sr}_2\text{PdO}_3$  and  $\text{Sr}_{1.7}\text{Ca}_{0.3}\text{PdO}_3$ .

**Supp. Figure 5:** CVs of 5 mM glucose/0.1 M NaOH at graphite/ $\text{Sr}_{1.7}\text{Ca}_{0.3}\text{PdO}_3$  at different scan rates (5–100  $\text{mV s}^{-1}$ ), the inset; the plot of the anodic peak current values versus square root of scan rate for 5 mM glucose/0.1 M NaOH at graphite/ $\text{Sr}_{1.7}\text{Ca}_{0.3}\text{PdO}_3$ .

**Supp. Figure 6:** The effect of changing the pH value on the response of  $\text{Sr}_{1.7}\text{Ca}_{0.3}\text{PdO}_3$  in 5 mM glucose solution prepared in 0.1 M PBS of pH range (11.0–12.5) and inset (2.7–9).

**Supp. Figure 7:** The effect of using different concentrations of NaOH (0.01 M - 0.5 M) on the anodic potential of 5 mM glucose at graphite/  $\text{Sr}_{1.7}\text{Ca}_{0.3}\text{PdO}_3$ . Inset; the effect of using different concentrations of NaOH (0.01 M - 0.5 M) on the anodic peak current of 5 mM glucose at graphite/  $\text{Sr}_{1.7}\text{Ca}_{0.3}\text{PdO}_3$ .

**Supplement Table 1:** Comparison for determination of glucose at various modified electrodes-based literature reports.

| Electrode                                                                                                     | Technique           | Electrolyte        | LDR                                        | Sensitivity ( $\mu\text{A mM}^{-1}\text{cm}^{-2}$ ) | LOD ( $\mu\text{M}$ ) |
|---------------------------------------------------------------------------------------------------------------|---------------------|--------------------|--------------------------------------------|-----------------------------------------------------|-----------------------|
| <b>Pt/Ni–Co nanowires [1]</b>                                                                                 | Amperometric        | 0.1 M NaOH         | 0–0.2 mM                                   | 1125                                                | 1                     |
| <b>LaNiO<sub>3</sub> nanofibers [2]</b>                                                                       | Amperometric        | 0.1 M NaOH         | 1 $\mu\text{M}$ – 1000 $\mu\text{M}$       | 42.321                                              | 0.32                  |
| <b>P4VP-co-PAN [6]</b>                                                                                        | Amperometric        | 0.1 M PBS, pH 7.4  | 2.5 $\mu\text{M}$ – 0.58 mM                | 1382.8                                              | 0.58                  |
| <b>Cu-Co NSs/RGO-CHIT/GCE [7]</b>                                                                             | Amperometric        | 0.1 M NaOH         | 0.015 mM – 6.95 mM                         | 1921                                                | 10                    |
| <b>Pt/PGA/GCE [8]</b>                                                                                         | Amperometric        | 0.2 M PBS, pH 7.4  | 0.05 – 5.95 mM                             | Not reported                                        | 11                    |
| <b>Gold nanoparticles [11]</b>                                                                                | Voltammetric        | 0.1 M NaOH         | 0.1 mM – 25 mM                             | 87.5                                                | 50                    |
| <b>CNT/Au [12]</b>                                                                                            | Voltammetric        | 0.01 M PBS, pH 7.2 | 0 mM – 20 mM                               | 18.6                                                | 100                   |
| <b>CS-RGO–NiNPs [13]</b>                                                                                      | Amperometric        | 0.1 M NaOH         | 0.2 mM – 9 mM                              | 318.4                                               | 4.1                   |
| <b>PtNFs-GO [14]</b>                                                                                          | Amperometric        | 0.05 M PBS, pH 7.4 | 2 $\mu\text{M}$ – 10.3 mM                  | 1.26                                                | 2                     |
| <b>La<sub>0.6</sub>Sr<sub>0.4</sub>Co<sub>0.2</sub>Fe<sub>0.8</sub>O<sub>3-<math>\delta</math></sub> [17]</b> | Amperometric        | 0.1 M KOH          | 0 $\mu\text{M}$ – 200 $\mu\text{M}$        | 285                                                 | 7                     |
| <b>graphite/Sr<sub>1.7</sub>Ca<sub>0.3</sub>PdO<sub>3</sub> (This work)</b>                                   | <b>Voltammetric</b> | <b>0.1 M NaOH</b>  | <b>5 <math>\mu\text{M}</math> – 5.6 mM</b> | <b>5166.7</b>                                       | <b>0.0845</b>         |

P4VP-co-PAN; poly(4-vinylpyridine)-co-poly(acrylonitrile) copolymer, Cu-Co NSs/RGO-CHIT/GCE; dendritic copper-cobalt nanostructures/reduced graphene oxide-chitosan modified glassy carbon electrode, Pt/PGA/GCE; Pt onto a poly(glutamic acid) film modified glassy carbon electrode, CS-RGO–NiNPs; nanocomposites of chitosan-reduced graphene oxide– nickel nanoparticles, PtNFs-GO; glassy carbon electrode modified with platinum nanoflowers supported on graphene oxide and CNT/Au; nanosized gold onto carbonnanotubes.

Supp. Fig. 1

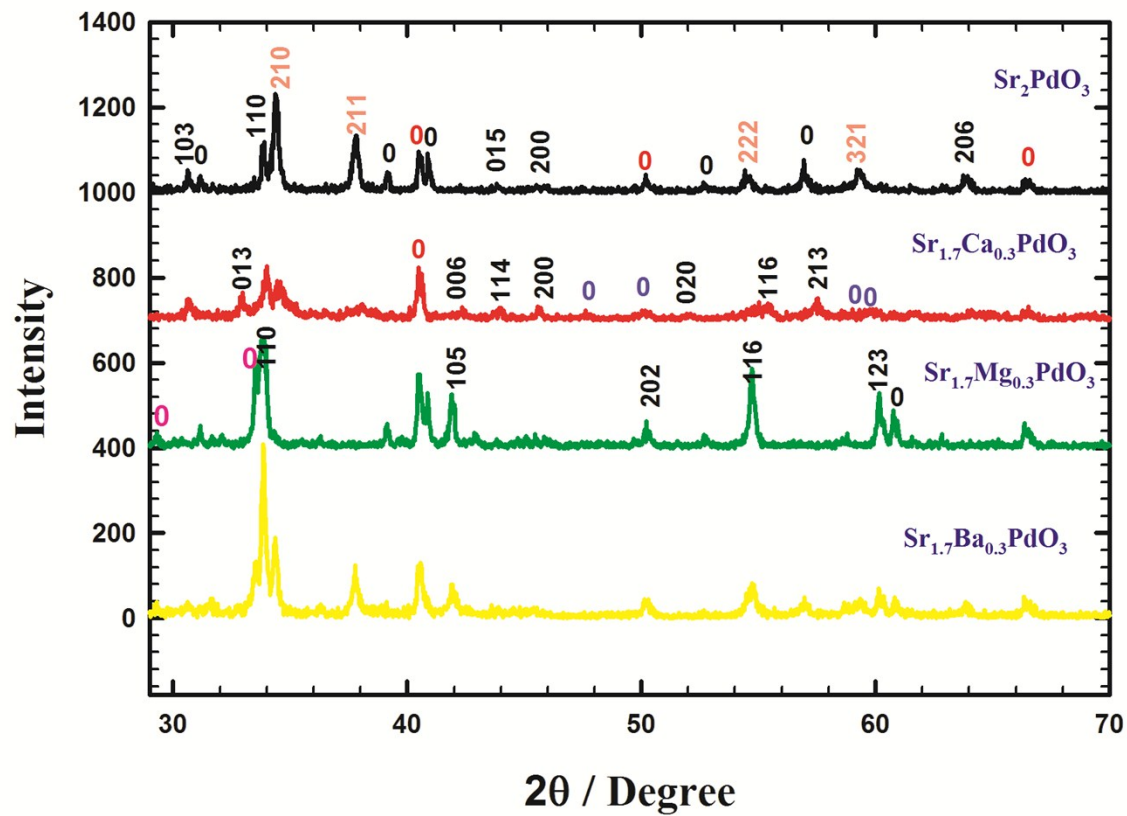

Supp. Fig. 2

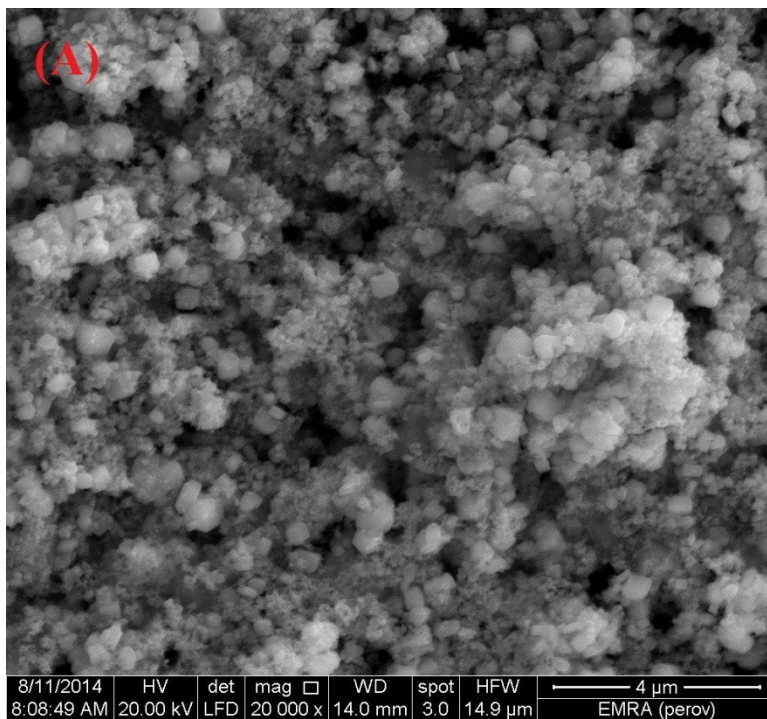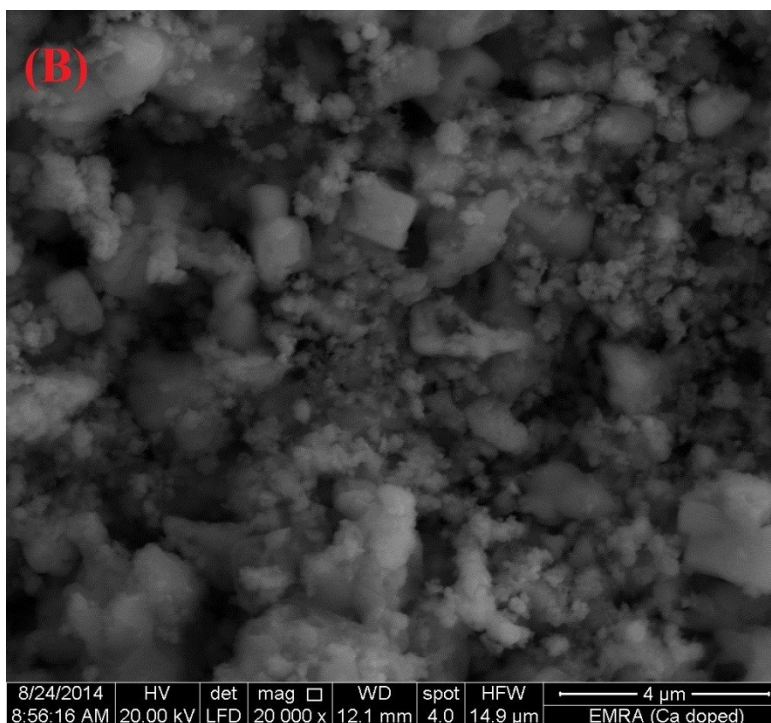

Supp. Fig. 3

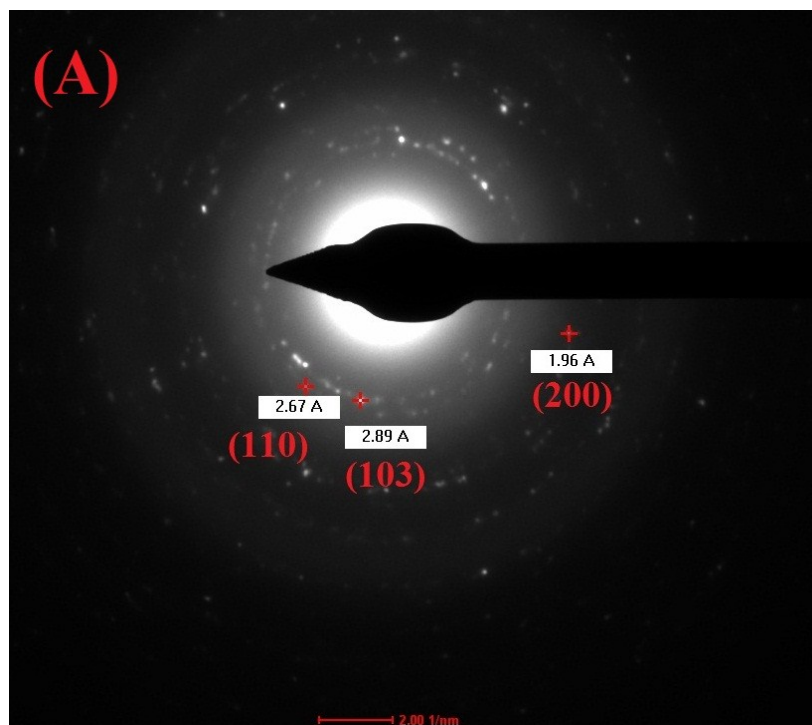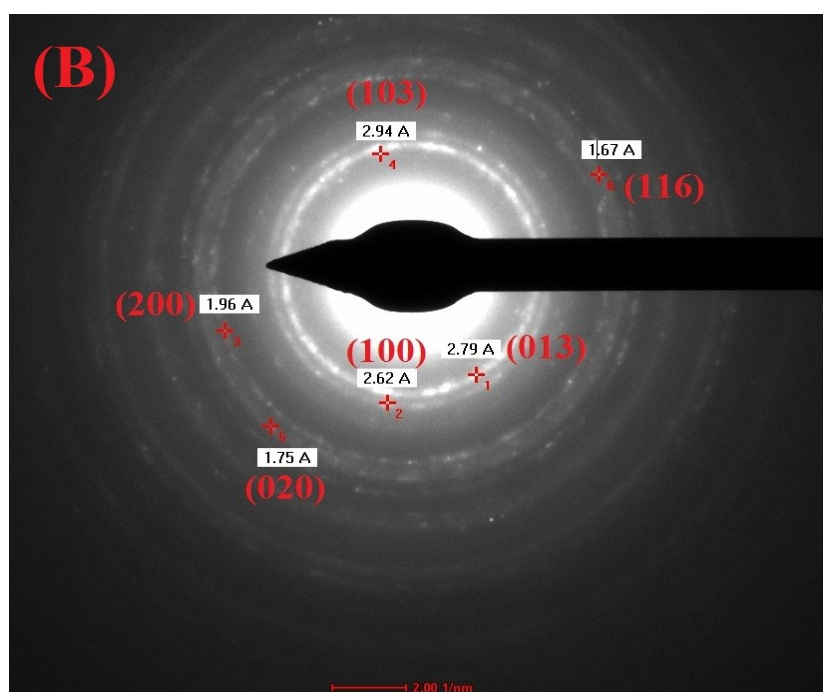

Supp. Fig. 4

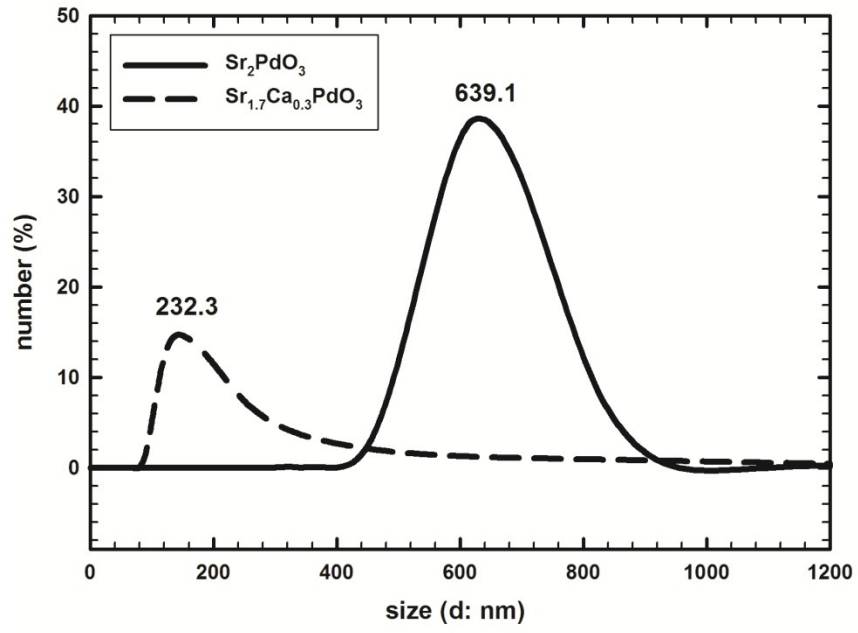

Supp. Fig. 5

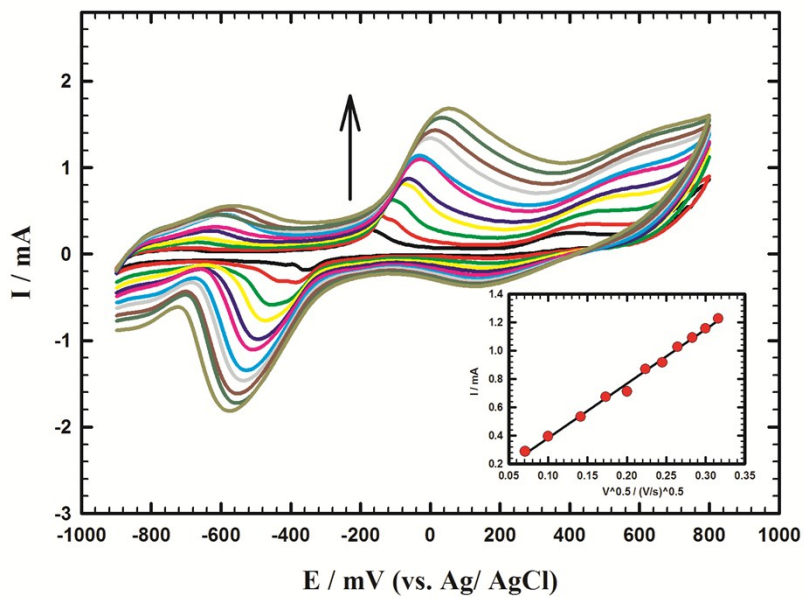

Supp. Fig. 6

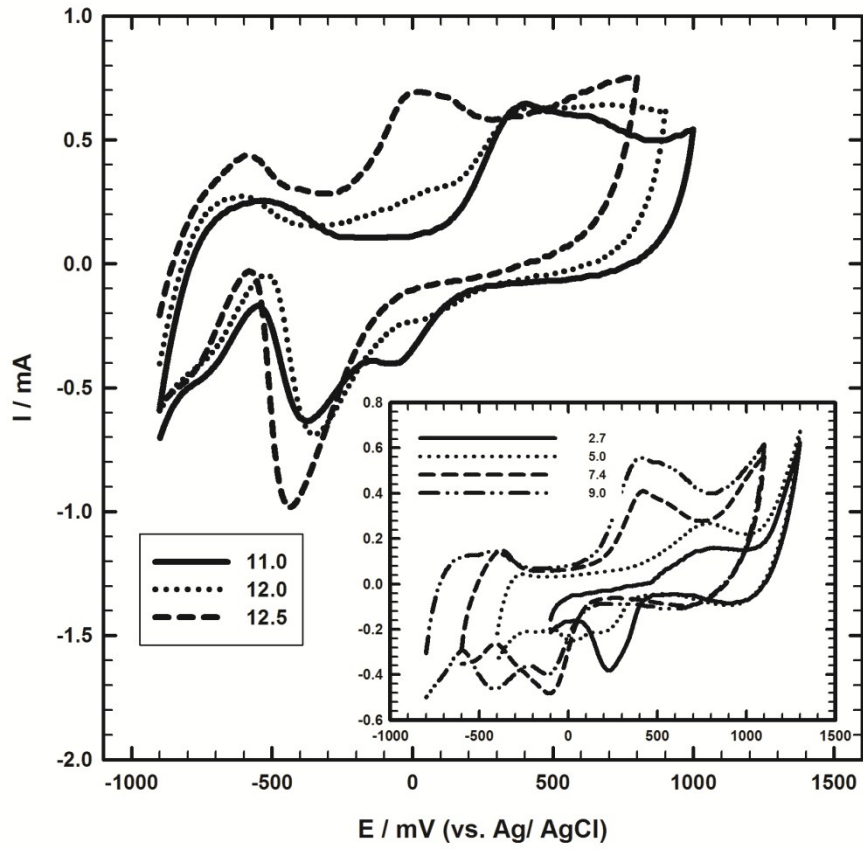



Supp. Fig. 7

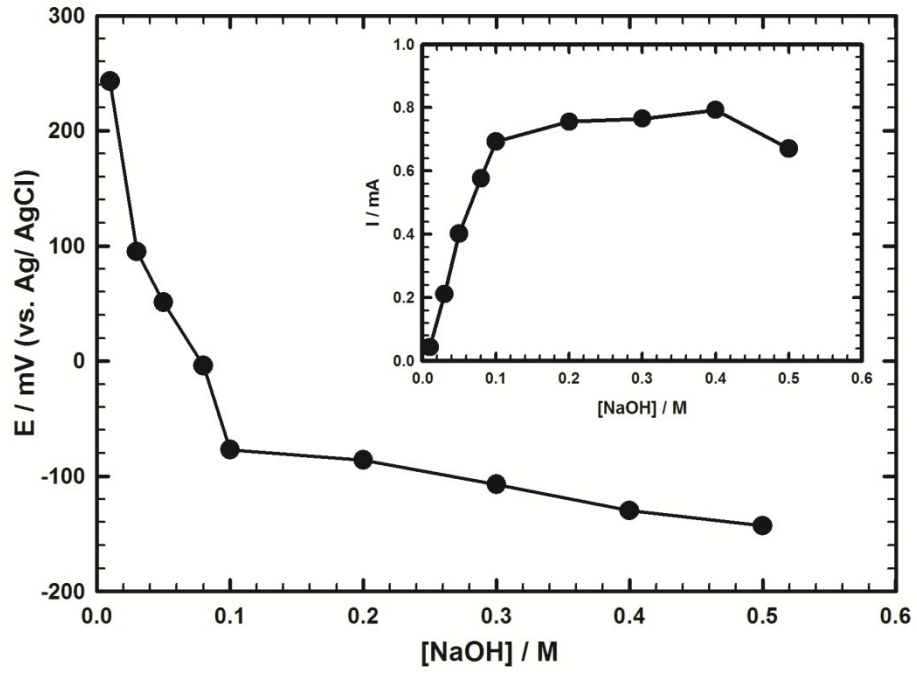

Supplement: c5ra24107c1.pdf [file c5ra24107c1.pdf]
